# Supplementary material for: Learning to resist the urge: a double-blind, randomized controlled trial investigating alcohol-specific inhibition training in abstinent patients with alcohol use disorder
Source: Springer Nature journal article supplement (doi:10.1186/s13063-019-3505-2), 2019-07-05
Supplement: MOESM2 [file 16901094]

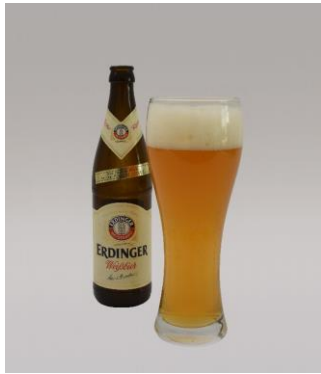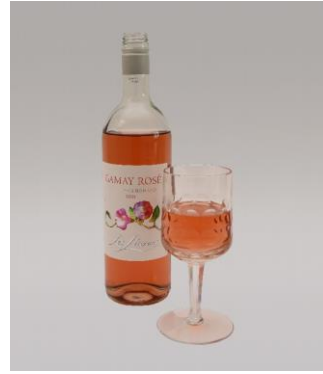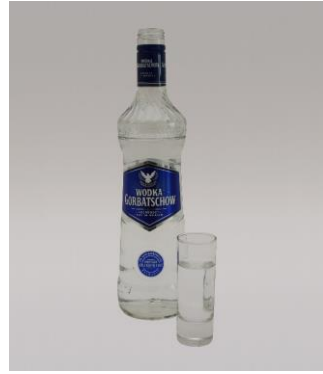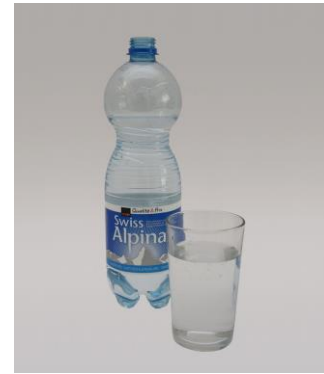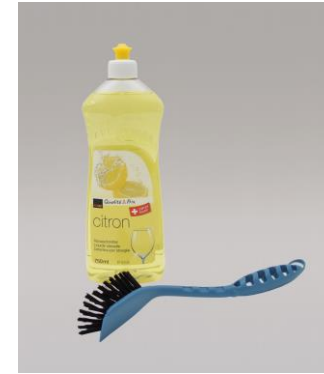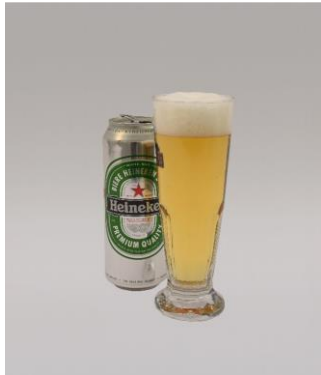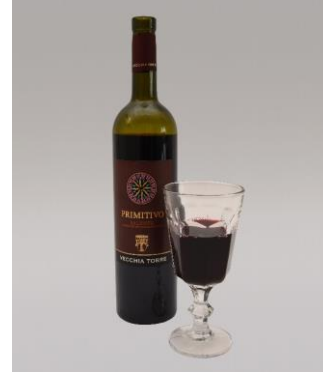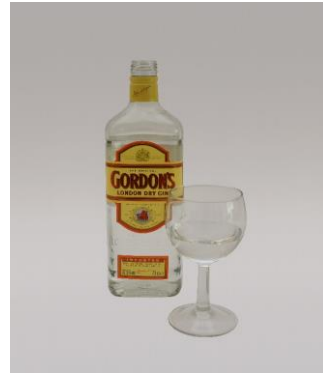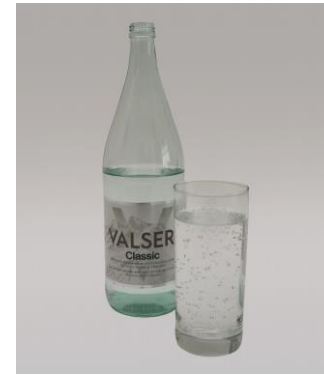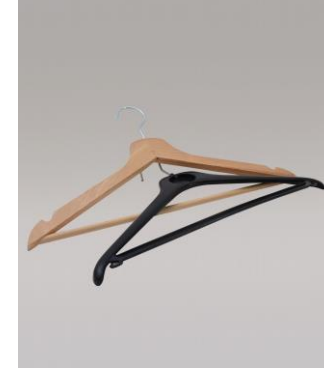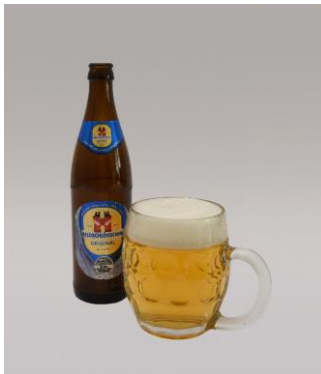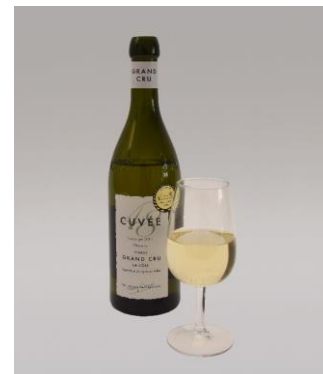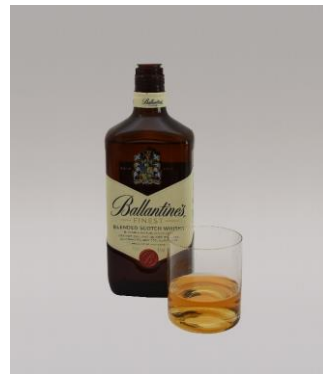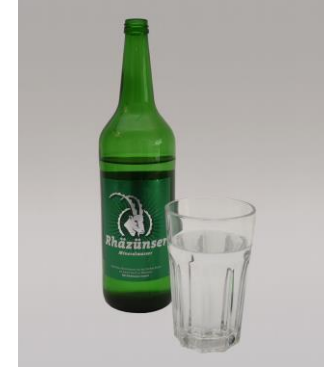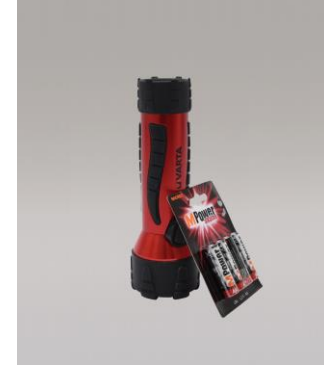

beer

wine

spirits

water

neutral
