# Supplementary material for: Learning to resist the urge: a double-blind, randomized controlled trial investigating alcohol-specific inhibition training in abstinent patients with alcohol use disorder
Source: Springer Nature journal article supplement (doi:10.1186/s13063-019-3505-2), 2019-07-05
Supplement: MOESM3 [file 16901094]

**Additional File 3** Overview of IAT blocks for both versions

| Block      |              | <b>Version PNNP</b><br>(left label - right label) | <b>Version NPPN</b><br>(left label - right label) | No of Trials |
|------------|--------------|---------------------------------------------------|---------------------------------------------------|--------------|
| B1         | P(target)    | alcohol - water                                   | water - alcohol                                   | 16           |
| B2         | P(affective) | positive - negative                               | positive - negative                               | 16           |
| B3         | P(combi)     | alcohol/positive - water/negative                 | water/positive – alcohol/negative                 | 16           |
| <i>B4</i>  | <b>Test</b>  | <i>alcohol/Positive - water/negative</i>          | <i>water/positive – alcohol/Negative</i>          | <i>64</i>    |
| B5         | P(affective) | negative - positive                               | negative - positive                               | 16           |
| B6         | P(combi)     | alcohol/negative - water/positive                 | water/negative – alcohol/positive                 | 16           |
| <i>B7</i>  | <b>Test</b>  | <i>alcohol/Negative - water/positive</i>          | <i>water/negative – alcohol/Positive</i>          | <i>64</i>    |
| B8         | P(target)    | water - alcohol                                   | alcohol - water                                   | 16           |
| B9         | P(affective) | positive - negative                               | positive - negative                               | 16           |
| B10        | P(combi)     | water/positive – alcohol/negative                 | alcohol/positive-water/negative                   | 16           |
| <i>B11</i> | <b>Test</b>  | <i>water/positive – alcohol/Negative</i>          | <i>alcohol/Positive – water/negative</i>          | <i>64</i>    |
| B12        | P(affective) | negative - positive                               | negative - positive                               | 16           |
| B13        | P(combi)     | water/negative – alcohol/positive                 | alcohol/negative - water/positive                 | 16           |
| <i>B14</i> | <b>Test</b>  | <i>water/negative – alcohol/Positive</i>          | <i>alcohol/Negative - water/positive</i>          | <i>64</i>    |

**Legend:** P: practice; B: block
