# Supplementary material for: Learning to resist the urge: a double-blind, randomized controlled trial investigating alcohol-specific inhibition training in abstinent patients with alcohol use disorder
Source: Springer Nature journal article supplement (doi:10.1186/s13063-019-3505-2), 2019-07-05
Supplement: MOESM5 [file 16901094]

## Additional File 5 Overview of measures for Healthy Controls

| Healthy Controls   |                                                      |                              |
|--------------------|------------------------------------------------------|------------------------------|
|                    | <b>Construct</b>                                     | <b>Measure</b>               |
| <b>Screening</b>   | In-/Exclusion criteria                               | Clinical Information         |
|                    | General psychopathology                              | BSCL                         |
|                    | Substance use                                        | DUDIT                        |
|                    | Alcohol Use                                          | AUDIT, AUD-S                 |
| <b>Measurement</b> | Demographics                                         | Demographics                 |
|                    | Behavioral Inhibition - / Behavioral Approach System | BIS / BAS                    |
|                    | Impulsivity                                          | I-8                          |
|                    | Sensation seeking                                    | NISS                         |
|                    | Attention Deficit and Hyperactivity Disorder         | ASRS-V1.1                    |
|                    | Antisocial Personality traits                        | ASPD                         |
|                    | Quality of life                                      | WHOQOL-BREF                  |
|                    | Stress and Coping                                    | SCI                          |
|                    | Alcohol expectancies                                 | CAEQ                         |
|                    | Craving                                              | OCDS-G                       |
|                    | Implicit association towards alcohol                 | IAT                          |
|                    | Inhibition (action restraint)                        | GNG                          |
|                    | Inhibition (action cancellation)                     | SST                          |
|                    | (only EEG group)                                     | Emotion & Emotion Regulation |
| (only EEG group)   | Alcohol use                                          | HDL                          |

**Legend:** The screening verifies in- and exclusion criteria, whereas the measurement qualifies the concepts of interest. The Emo-Check and HDL are only assessed in the EEG group. BSCL: Brief Symptom Check List; DUDIT: Drug Use Identification Test; AUDIT: Alcohol Use Disorders Identification Test; AUD-S: Alcohol Use Disorders Scale; BIS / BAS: Behavioral Inhibition System / Behavioral Approach System Scale; I-8: Scale for Impulsive Behavior; NISS: Need Inventory of Sensation Seeking; ASRS-V1.1: ADHD Self Report Scale; ASPD: Antisocial Personality Disorder; WHOQOL-BREF: WHO Quality of Life Scale; SCI: Stress and Coping Inventory; CAEQ: Comprehensive Alcohol Expectancy Questionnaire; OCDS-G: Obsessive Compulsive Drinking Scale; HDL: Health and Daily Living Form; IAT: Implicit Association Test; GNG: Go-NoGo Task; SST: Stop-Signal Task.
